# Supplementary material for: Is the Relationship between Prenatal Exposure to PCB-153 and Decreased Birth Weight Attributable to Pharmacokinetics?
Source: PubMed Central journal article supplement (PMC3801461; doi:10.1289/ehp.1206457), 2013-08-09
Supplement: ehp.1206457.s001.pdf [file ehp.1206457.s001.pdf]

## **SUPPLEMENTAL MATERIAL**

### **Is the Relationship between Prenatal Exposure to PCB-153 and Decreased Birth Weight Attributable to Pharmacokinetics?**

Marc-André Verner, Robin McDougall, Anders Glynn, Melvin E Andersen, Harvey J  
Clewell 3rd, Matthew P Longnecker

#### **Table of contents**

|                             |   |
|-----------------------------|---|
| Model code (CSL file) ..... | 2 |
| Model script (M file).....  | 6 |

**! MODEL CODE (CSL FILE)**  
**! Software: acsIX (Aegis Technologies Group, Inc., Huntsville, AL, USA)**

PROGRAM

```

!*****!
!*****!
!** PCB-153 toxicokinetic model **!
!** Coded by Marc-Andre Verner **!
!** **!
!** Units **!
!** Time: hours **!
!** Volumes: L **!
!** Weights: kg **!
!** Quantities: ug **!
!*****!
!*****!

```

INITIAL ! Start of initial section

```

!*****!
! Individual information

```

! Maternal variables

```

CONSTANT AGE_DELIVERY = 25.00 ! Age of mother at delivery (years)
CONSTANT PREPREGNANCY_BW = 60.0 ! Pre-pregnancy body weight (kg)
CONSTANT GWG = 12.5 ! Gestational weight gain (kg)
CONSTANT MULTIPLIER_MATERNAL_LIPIDS = 1.0 ! Multiplier for maternal body lipids
CONSTANT MULTIPLIER_PLASMA_LIPIDS = 1.0 ! Multiplier for lipids in maternal plasma
CONSTANT LIPID_GAIN = 5.0 ! Lipid gain during pregnancy (kg)
CONSTANT HALF_LIFE_PCB153 = 14.4 ! PCB-153 half-life (years)

```

! Fetal variables

```

CONSTANT SEX = 0 ! Sex (0=female, 1=male)
CONSTANT GESTATIONAL_AGE = 0.75 ! Gestational age at birth (years)
CONSTANT BIRTHWEIGHT = 3.4 ! Birthweight (kg)
CONSTANT MULTIPLIER_FETAL_LIPIDS = 1.0 ! Multiplier for fetal body lipids
CONSTANT CORD_PLASMA_LIPIDS = 1.83 ! Lipids in cord (g/L)

```

! Dosing variable

```

CONSTANT DOSE = 0.01 ! Daily oral dose (ug/kg)

```

! Sample variables for dose optimization using the script

```

CONSTANT PCB153_LEVEL = 50.0 ! Maternal PCB-153 level at sample (ug/kg lipid)
CONSTANT MOTHER_AGE_SAMPLE = 24.25 ! Age of mother at sample (years)

```

END ! End of initial section

DYNAMIC ! Start of dynamic sections

```

!*****!
! Length of simulations

```

```

TSTOPPage = AGE_delivery ! Length of simulation / mother's age (yrs)
TSTOP = 24*365*TSTOPPage ! Length of simulation (hrs)
POINTS = 300 ! Number of points in plot
schedule stopthesim .at. TSTOP ! Schedule end of simulation
discrete stopthesim ! When simulation reaches stopthesim event...
term(.true.) ! ...terminate simulation
end ! End of discrete event

```

```

!*****!
! Simulation parameters

```

```

ALGORITHM IALG = 15 ! Use CVODE algorithm
MAXINTERVAL MAXT = 10000 ! Maximum interval for integrations
MININTERVAL MINT = 0.01 ! Minimal interval for integrations
CINTERVAL CINT = 24 ! Communication interval

```

DERIVATIVE ! Start of DERIVATIVE SECTION

```

!*****!
! Time points to record PCB-153 levels

```

Age\_conception = AGE\_Delivery-GESTATIONAL\_AGE ! Age at conception (years)

```

Age_c_mom_1 = Age_conception+0.083 ! Age at 1 month of pregnancy (years)
Age_c_mom_2 = Age_conception+0.167 ! Age at 2 months of pregnancy (years)
Age_c_mom_3 = Age_conception+0.250 ! Age at 3 months of pregnancy (years)
Age_c_mom_4 = Age_conception+0.333 ! Age at 4 months of pregnancy (years)
Age_c_mom_5 = Age_conception+0.417 ! Age at 5 months of pregnancy (years)
Age_c_mom_6 = Age_conception+0.500 ! Age at 6 months of pregnancy (years)
Age_c_mom_7 = Age_conception+0.583 ! Age at 7 months of pregnancy (years)
Age_c_mom_8 = Age_conception+0.667 ! Age at 8 months of pregnancy (years)
Age_c_mom_9 = Age_conception+0.749 ! Age at 9 months of pregnancy (years)

!*****
! Basal body weight (not taking pregnancy weight changes into account)
! Curves are based on 50th percentile charts and adjusted for individual measurements

! Mother
table table_bw_mother,1,10/0.0, 0.5, 1.0, 2.0, 5.0, 10.0, 13.0, 16.0, 20.0, 100.0, &
3.4, 7.2, 9.5, 12.1, 18.0, 33.0, 46.0, 54.0, 58.0, 58.0/
Diff_profile = (1-Switch_conception) &
*(AGE*(PREPREGNANCY_BW-table_bw_mother(Age_conception))/Age_conception) &
+Switch_conception*(PREPREGNANCY_BW-table_bw_mother(Age_conception))
BW = Diff_profile + table_bw_mother(Age)

! Fetus
table table_fetal_weight,1,7/0.0, 0.217, 0.353, 0.463, 0.551, 0.639, 0.768, &
0.0, 0.0, 0.26, 0.69, 1.25, 2.02, 3.28/
NORM_BIRTHWEIGHT_FOR_GA = table_fetal_weight(GESTATIONAL_AGE)
RATIO_BIRTHWEIGHT_NORM = BIRTHWEIGHT/NORM_BIRTHWEIGHT_FOR_GA
FETAL_WEIGHT = (SWITCH_CONCEPTION-SWITCH_DELIVERY) &
*RATIO_BIRTHWEIGHT_NORM*table_fetal_weight(FETAL_AGE)

!*****
! BODY FAT

! Mother
table bodyfat_mother,1,17/0.0,0.08,0.17,0.25,0.33,0.5,1,2,4,6,8,10,12,16,29,39,69, &
0.15,0.16,0.21,0.24,0.25,0.26,0.24,0.20,0.17,0.16,0.17, &
0.19,0.23,0.26,0.29,0.31,0.41/
SLOPE_GAIN_PREGNANCY = (SWITCH_CONCEPTION-SWITCH_DELIVERY) &
*(LIPID_GAIN*(AGE-AGE_CONCEPTION)/GESTATIONAL_AGE)
MATERNAL_LIPIDS = MULTIPLIER_MATERNAL_LIPIDS*(BW*bodyfat_mother(age)) &
+SLOPE_GAIN_PREGNANCY
table plasma_lipids,1,2/0.0, 0.75, 4.4, 7.9/
MATERNAL_PLASMA_LIPIDS = MULTIPLIER_PLASMA_LIPIDS*plasma_lipids(FETAL_AGE)

! Fetus
FETAL_LIPIDS = MULTIPLIER_FETAL_LIPIDS &
*((SWITCH_CONCEPTION-SWITCH_DELIVERY) &
*FETAL_WEIGHT*(sex*0.14+(1-sex)*0.15)+0.001)

!*****
! Elimination
HALF_LIFE = HALF_LIFE_PCB153*365*24 ! PCB-153 Half-life (hours)

!*****
! Rates of transfer
RAO = BW*DOSE/24 ! PCB-153 intake rate (ug/h)
ELIMINATION = A_MOTHER*log(2)/HALF_LIFE ! Elimination rate
MOTHER_FETUS_TRANSFER = (SWITCH_CONCEPTION-SWITCH_DELIVERY)*(C_MOTHER) ! Mother-fetus diffusion
FETUS_MOTHER_TRANSFER = (SWITCH_CONCEPTION-SWITCH_DELIVERY)*(C_FETUS) ! Fetus-mother diffusion

!*****
! Age
RAGE = 1/24./365. ! Rate of age increase (years/h)
AGE = INTEG(RAGE, 0.) ! Age of mother (years)
FETAL_AGE = SWITCH_CONCEPTION*(AGE-AGE_CONCEPTION) ! Age of fetus (years)

!*****
! Discrete events

! Set initial values to zero
initial
SWITCH_CONCEPTION = 0 ! I/O Switch for beginning of pregnancy

```

```

SWITCH_DELIVERY = 0 ! I/O Switch for delivery
C_MOTHER_3RULE_LIPIDS = 0 ! PCB-153 level in maternal lipids at sample (ug/kg lipid)
C_MONTH_0_LIPIDS = 0 ! PCB-153 in maternal lipids - conception (ug/kg lipid)
C_MONTH_1_LIPIDS = 0 ! PCB-153 in maternal lipids - 1st month of pregnancy (ug/kg lipid)
C_MONTH_2_LIPIDS = 0 ! PCB-153 in maternal lipids - 2nd month of pregnancy (ug/kg lipid)
C_MONTH_3_LIPIDS = 0 ! PCB-153 in maternal lipids - 3rd month of pregnancy (ug/kg lipid)
C_MONTH_4_LIPIDS = 0 ! PCB-153 in maternal lipids - 4th month of pregnancy (ug/kg lipid)
C_MONTH_5_LIPIDS = 0 ! PCB-153 in maternal lipids - 5th month of pregnancy (ug/kg lipid)
C_MONTH_6_LIPIDS = 0 ! PCB-153 in maternal lipids - 6th month of pregnancy (ug/kg lipid)
C_MONTH_7_LIPIDS = 0 ! PCB-153 in maternal lipids - 7th month of pregnancy (ug/kg lipid)
C_MONTH_8_LIPIDS = 0 ! PCB-153 in maternal lipids - 8th month of pregnancy (ug/kg lipid)
C_MONTH_9_LIPIDS = 0 ! PCB-153 in maternal lipids - delivery (ug/kg lipid)
C_CORD_LIPIDS = 0 ! PCB-153 in cord plasma lipids - delivery (ug/kg lipid)
C_MOTHER_3RULE_PLASMA = 0 ! PCB-153 in maternal plasma at sample (ug/L)
C_MONTH_0_PLASMA = 0 ! PCB-153 in maternal plasma - conception (ug/L)
C_MONTH_1_PLASMA = 0 ! PCB-153 in maternal plasma - 1st month of pregnancy (ug/L)
C_MONTH_2_PLASMA = 0 ! PCB-153 in maternal plasma - 2nd month of pregnancy (ug/L)
C_MONTH_3_PLASMA = 0 ! PCB-153 in maternal plasma - 3rd month of pregnancy (ug/L)
C_MONTH_4_PLASMA = 0 ! PCB-153 in maternal plasma - 4th month of pregnancy (ug/L)
C_MONTH_5_PLASMA = 0 ! PCB-153 in maternal plasma - 5th month of pregnancy (ug/L)
C_MONTH_6_PLASMA = 0 ! PCB-153 in maternal plasma - 6th month of pregnancy (ug/L)
C_MONTH_7_PLASMA = 0 ! PCB-153 in maternal plasma - 7th month of pregnancy (ug/L)
C_MONTH_8_PLASMA = 0 ! PCB-153 in maternal plasma - 8th month of pregnancy (ug/L)
C_MONTH_9_PLASMA = 0 ! PCB-153 in maternal plasma - delivery (ug/L)
C_CORD_PLASMA = 0 ! PCB-153 in cord plasma - delivery (ug/L)
end

```

```

! Update values at discrete events
schedule mothersample .xn. (MOTHER_AGE_SAMPLE-AGE)
discrete mothersample
  C_MOTHER_3RULE_PLASMA = C_MOTHER_P
  C_MOTHER_3RULE_LIPIDS = C_MOTHER
End
schedule c_mom_month0 .xn. (Age_conception-AGE)
discrete c_mom_month0
  SWITCH_CONCEPTION = 1
  C_MONTH_0_PLASMA = C_MOTHER_P
  C_MONTH_0_LIPIDS = C_MOTHER
End
schedule delivery .xn. (AGE_delivery-AGE)
discrete delivery
  SWITCH_DELIVERY = 1
End
schedule c_mom_month1 .xn. (Age_c_mom_1-AGE)
discrete c_mom_month1
  C_MONTH_1_PLASMA = C_MOTHER_P
  C_MONTH_1_LIPIDS = C_MOTHER
End
schedule c_mom_month2 .xn. (Age_c_mom_2-AGE)
discrete c_mom_month2
  C_MONTH_2_PLASMA = C_MOTHER_P
  C_MONTH_2_LIPIDS = C_MOTHER
End
schedule c_mom_month3 .xn. (Age_c_mom_3-AGE)
discrete c_mom_month3
  C_MONTH_3_PLASMA = C_MOTHER_P
  C_MONTH_3_LIPIDS = C_MOTHER
End
schedule c_mom_month4 .xn. (Age_c_mom_4-AGE)
discrete c_mom_month4
  C_MONTH_4_PLASMA = C_MOTHER_P
  C_MONTH_4_LIPIDS = C_MOTHER
End
schedule c_mom_month5 .xn. (Age_c_mom_5-AGE)
discrete c_mom_month5
  C_MONTH_5_PLASMA = C_MOTHER_P
  C_MONTH_5_LIPIDS = C_MOTHER
End
schedule c_mom_month6 .xn. (Age_c_mom_6-AGE)
discrete c_mom_month6
  C_MONTH_6_PLASMA = C_MOTHER_P
  C_MONTH_6_LIPIDS = C_MOTHER
End
schedule c_mom_month7 .xn. (Age_c_mom_7-AGE)
discrete c_mom_month7
  C_MONTH_7_PLASMA = C_MOTHER_P
  C_MONTH_7_LIPIDS = C_MOTHER
End
schedule c_mom_month8 .xn. (Age_c_mom_8-AGE)
discrete c_mom_month8
  C_MONTH_8_PLASMA = C_MOTHER_P

```

```

      C_MONTH_8_LIPIDS = C_MOTHER
End
schedule c_mom_month9 .xn. (Age_c_mom_9-AGE)
discrete c_mom_month9
      C_MONTH_9_PLASMA = C_MOTHER_P
      C_MONTH_9_LIPIDS = C_MOTHER
      C_CORD_PLASMA    = (C_FETUS/1000)*CORD_PLASMA_LIPIDS
      C_CORD_LIPIDS    = C_FETUS
End

```

```

!*****
! Mass balance differential equations

```

```

RA_MOTHER = RAO-ELIMINATION-MOTHER_FETUS_TRANSFER &
            +FETUS_MOTHER_TRANSFER           ! Rate PCB-153 in maternal lipids (ug/h)
A_MOTHER  = INTEG(RA_MOTHER, 0.0)           ! PCB-153 in maternal lipids (ug)
C_MOTHER  = A_MOTHER/MATERNAL_LIPIDS        ! Concentration in maternal lipids (ug/kg)
C_MOTHER_P = (C_MOTHER/1000)*MATERNAL_PLASMA_LIPIDS ! Concentration in maternal plasma (ug/L)

```

```

RA_FETUS  = MOTHER_FETUS_TRANSFER-FETUS_MOTHER_TRANSFER ! Rate PCB-153 in fetal lipids (ug/h)
A_FETUS   = INTEG(RA_FETUS, 0.0)                       ! PCB-153 in fetal lipids (ug)
C_FETUS   = A_FETUS/FETAL_LIPIDS                       ! Concentration in fetal lipids (ug/kg)

```

```

END ! DERIVATIVE

```

```

END ! DYNAMIC

```

```

END ! PROGRAM

```

**! MODEL SCRIPT (M FILE)**  
**! Software: acsIX (Aegis Technologies Group, Inc., Huntsville, AL, USA)**

\*\*\*\*\*%  
% Script for the Verner et al. 2013 PCB-Birthweight analyses %  
\*\*\*\*\*%

prepare @all  
save

\*\*\*\*\*%  
% Simulation parameters %  
\*\*\*\*\*%

CIEITG = 0;  
WESITG = 0;  
WXDITG = 0;  
WEDITG = 0;  
CJVITG = 0;  
WNDITG = 0;  
CINT = 100000;  
MINT = 0.1;  
MAXT = 100000;  
IALG = 15;

\*\*\*\*\*%  
% Creates arrays to record simulated data %  
\*\*\*\*\*%

C\_MONTH\_0\_LIPIDSS = [];  
C\_MONTH\_1\_LIPIDSS = [];  
C\_MONTH\_2\_LIPIDSS = [];  
C\_MONTH\_3\_LIPIDSS = [];  
C\_MONTH\_4\_LIPIDSS = [];  
C\_MONTH\_5\_LIPIDSS = [];  
C\_MONTH\_6\_LIPIDSS = [];  
C\_MONTH\_7\_LIPIDSS = [];  
C\_MONTH\_8\_LIPIDSS = [];  
C\_MONTH\_9\_LIPIDSS = [];  
C\_CORD\_LIPIDSS = [];  
C\_MONTH\_0\_PLASMAS = [];  
C\_MONTH\_1\_PLASMAS = [];  
C\_MONTH\_2\_PLASMAS = [];  
C\_MONTH\_3\_PLASMAS = [];  
C\_MONTH\_4\_PLASMAS = [];  
C\_MONTH\_5\_PLASMAS = [];  
C\_MONTH\_6\_PLASMAS = [];  
C\_MONTH\_7\_PLASMAS = [];  
C\_MONTH\_8\_PLASMAS = [];  
C\_MONTH\_9\_PLASMAS = [];  
C\_CORD\_PLASMAS = [];  
doses = [];  
dataMCs = [];

\*\*\*\*\*%  
% Start of automation script %  
\*\*\*\*\*%

Num\_MC\_iterations=250000; % Number of individuals  
seedrnd(123456789); % Seed

for iteration=[1:1:Num\_MC\_iterations]

% Display iteration in command window  
disp(sprintf("Iteration %#d of %d", iteration, Num\_MC\_iterations));  
disp("-----");

% Parameter distributions and regressions

AGE\_DELIVERY = normrnd(24.3, 6.1, 15.0, 41.0); % Age at delivery (years)  
PREPREGNANCY\_BW = normrnd(59.0, 11.6, 25.0, 163.0); % Pre-pregnancy body weight (kg)  
GWG = normrnd(10.3, 4.7, 0.0, 44.0); % Gestational weight gain (kg)  
MULTIPLIER\_MATERNAL\_LIPIDS = normrnd(1.0, 0.16, 0.68, 1.32); % Maternal body lipids multiplier  
MULTIPLIER\_PLASMA\_LIPIDS = normrnd(1.0, 0.13, 0.72, 1.34); % Maternal plasma lipids multiplier  
HALF\_LIFE\_PCB153 = normrnd(14.4, 2.2, 10.0, 18.8); % PCB-153 half-life (years)  
RESID\_LIPID\_GAIN = normrnd(0.0, 2.69, -5.4, 5.4); % Residuals GWG-lipid gain (kg)  
LIPID\_GAIN = 0.675\*GWG-3.89+RESID\_LIPID\_GAIN; % Lipid gain during pregnancy (kg)  
SEX = bernrnd(0.5); % Sex (Female=0, Male=1)

```

MULTIPLIER_FETAL_LIPIDS = normrnd(1.0, 0.17, 0.66, 1.34); % Fetal lipids multiplier
CORD_PLASMA_LIPIDS = normrnd(1.83, 0.24, 1.35, 2.31); % Lipids in cord plasma (g/L)
RESID_BW = normrnd(0.0, 0.49, -2.82, 2.23); % Residuals birthweight (kg)
BIRTHWEIGHT = 0.02262*GWG+2.982+RESID_BW; % Birthweight (kg)
MOTHER_AGE_SAMPLE = AGE_DELIVERY-0.75 ; % Age at conception (years)

% Maternal plasma PCB-153 levels at conception
% (to replicate the range of cord serum levels in Govarts et al. [2012])
ASD = 0.412; % Arithmetic standard deviation
AM = 0.487; % Arithmetic mean (ug/L)
sigma = sqrt(log(1+ASD^2/AM^2)); % Conversion for the lognormal distribution
mu = log(AM)-0.5*sigma^2; % Conversion for the lognormal distribution
PCB153_LEVEL = lognrnd(mu, sigma, 0.001, 10.0); % Maternal plasma level at conception (ug/L)

% Dose no1 to start the daily dose optimization process
DOSE = 0.01;

% Start first simulation
start @nocallback

% Optimization of daily dose to match sampled PCB-153 levels (PCB153_LEVEL)
rule3 = C_MOTHER_3RULE_PLASMA;
DOSE = PCB153_LEVEL*0.01/rule3;
doses = [doses; DOSE];

% Start second simulation
start @nocallback

% Record results
C_MONTH_0_LIPIDSS = C_MONTH_0_LIPIDS;
C_MONTH_1_LIPIDSS = C_MONTH_1_LIPIDS;
C_MONTH_2_LIPIDSS = C_MONTH_2_LIPIDS;
C_MONTH_3_LIPIDSS = C_MONTH_3_LIPIDS;
C_MONTH_4_LIPIDSS = C_MONTH_4_LIPIDS;
C_MONTH_5_LIPIDSS = C_MONTH_5_LIPIDS;
C_MONTH_6_LIPIDSS = C_MONTH_6_LIPIDS;
C_MONTH_7_LIPIDSS = C_MONTH_7_LIPIDS;
C_MONTH_8_LIPIDSS = C_MONTH_8_LIPIDS;
C_MONTH_9_LIPIDSS = C_MONTH_9_LIPIDS;
C_CORD_LIPIDSS = C_CORD_LIPIDS;
C_MONTH_0_PLASMAS = C_MONTH_0_PLASMA;
C_MONTH_1_PLASMAS = C_MONTH_1_PLASMA;
C_MONTH_2_PLASMAS = C_MONTH_2_PLASMA;
C_MONTH_3_PLASMAS = C_MONTH_3_PLASMA;
C_MONTH_4_PLASMAS = C_MONTH_4_PLASMA;
C_MONTH_5_PLASMAS = C_MONTH_5_PLASMA;
C_MONTH_6_PLASMAS = C_MONTH_6_PLASMA;
C_MONTH_7_PLASMAS = C_MONTH_7_PLASMA;
C_MONTH_8_PLASMAS = C_MONTH_8_PLASMA;
C_MONTH_9_PLASMAS = C_MONTH_9_PLASMA;
C_CORD_PLASMAS = C_CORD_PLASMA;
doses = DOSE;

% Compile results in an array
dataMCS = [dataMCS; C_MONTH_0_LIPIDSS C_MONTH_1_LIPIDSS C_MONTH_2_LIPIDSS ...
C_MONTH_3_LIPIDSS C_MONTH_4_LIPIDSS C_MONTH_5_LIPIDSS ...
C_MONTH_6_LIPIDSS C_MONTH_7_LIPIDSS C_MONTH_8_LIPIDSS ...
C_MONTH_9_LIPIDSS C_CORD_LIPIDSS ...
C_MONTH_0_PLASMAS C_MONTH_1_PLASMAS C_MONTH_2_PLASMAS ...
C_MONTH_3_PLASMAS C_MONTH_4_PLASMAS C_MONTH_5_PLASMAS ...
C_MONTH_6_PLASMAS C_MONTH_7_PLASMAS C_MONTH_8_PLASMAS ...
C_MONTH_9_PLASMAS C_CORD_PLASMAS ...
doses AGE_DELIVERY PREPREGNANCY_BW GWG MULTIPLIER_MATERNAL_LIPIDS ...
MULTIPLIER_PLASMA_LIPIDS HALF_LIFE_PCB153 RESID_LIPID_GAIN ...
LIPID_GAIN SEX MULTIPLIER_FETAL_LIPIDS CORD_PLASMA_LIPIDS ...
RESID_BW BIRTHWEIGHT MOTHER_AGE_SAMPLE];

end %individuals

%%%%%%%%%%%%%%%%%%%%%%%%%%%%%%%%%%%%%%%%%%%%%%%%%%%%%%%%%%%%%%%%%%%%%%%%%%%%%%
% Command to write results in a .csv file %
%%%%%%%%%%%%%%%%%%%%%%%%%%%%%%%%%%%%%%%%%%%%%%%%%%%%%%%%%%%%%%%%%%%%%%%%%%%%%%
save dataMCS @file=PCB_BW_results.csv @format=ascii @separator=comma

```
